# Supplementary material
Source: publisher site journal article supplement (http://www.spandidos-publications.com/5992/downloadSupplementary)

Figure S1. Relationship between CDK12, IGFBP3 and PCa prognosis. Analysis of the effect of (A) CDK12 and (B) IGFBP3 expression on overall survival in patients with PCa in the LinkedOmics database. IGFBP3, insulin like growth factor binding protein 3; PCa, prostate cancer.

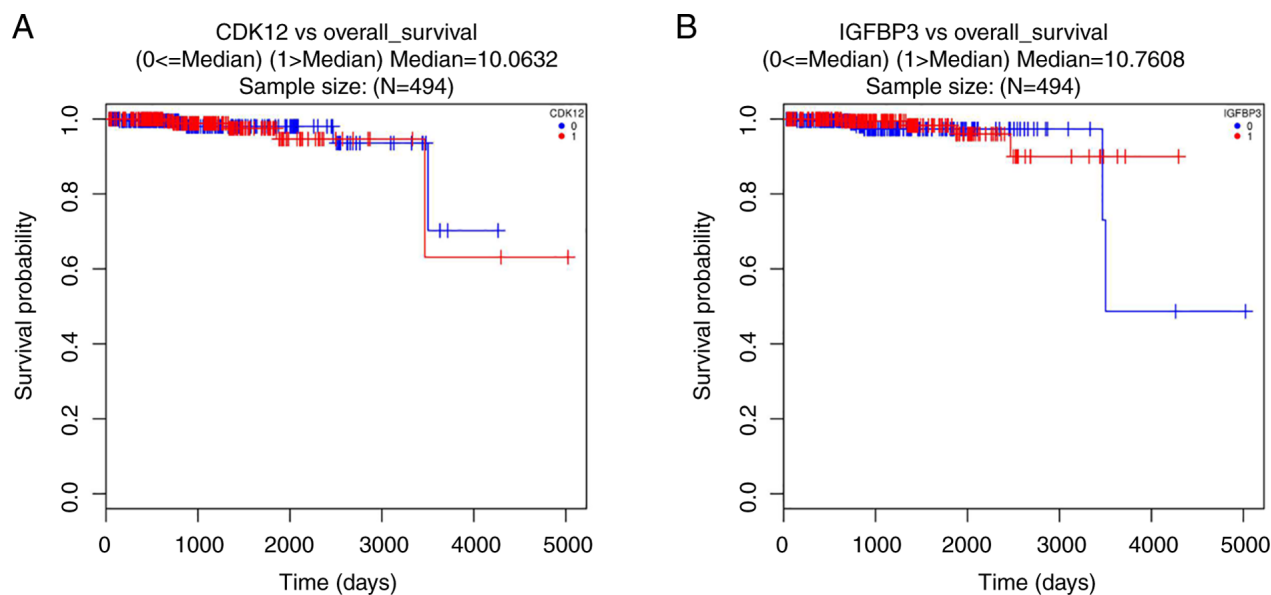

Supplement: Supplementary file 1 [file downloadSupplementary]
